# Supplementary material for: In Vitro and In Vivo Miltefosine Susceptibility of a Leishmania amazonensis Isolate from a Patient with Diffuse Cutaneous Leishmaniasis
Source: PubMed Central journal article supplement (PMC4102453; doi:10.1371/journal.pntd.0002999), 2014-07-17
Supplement: pntd.0002999.s004.pdf [file pntd.0002999.s004.pdf]

**Table S1.** Primers used in this study for amplifying and sequencing *L. amazonensis* *MT*, *PK* and *Ros3* genes. Primers were designed based on *L. mexicana* (MHOM/GT/2001/U1103) nucleotide sequences available at TriTrypDB (<http://www.tritrypdb.org/>). *L. mexicana* gene ID for *MT*, *PK* and *Ros3* are LmxM.13.1530, LmxM.29.1250 and LmxM.31.0510, respectively. Restriction sites are shown in bold.

|                                               |                                           |
|-----------------------------------------------|-------------------------------------------|
| LmxM.13.1530 F ( <i>Xba</i> I)                | 5' <b>CGCTCTAGAC</b> ACCACCACCACTCCTGCCT  |
| LmxM.13.1530 R ( <i>Hind</i> III)             | 5' CG <b>CAAGCTT</b> TCTGCTCACGTTCCGCCCTC |
| LmxM.13.1530 F1<br>(internal - position 736)  | 5' GAGGAGCACGCACTCTCGCT                   |
| LmxM.13.1530 F2<br>(internal - position 1432) | 5' CAGCCCTTCAAGGACGACAC                   |
| LmxM.13.1530 F3<br>(internal - position 2097) | 5' GCGCAACGACTTCATCGACC                   |
| LmxM.13.1530 R1<br>(internal - position 2491) | 5' CGGCATGTGCACCTTCCAGC                   |
| LmxM.13.1530 R2<br>(internal - position 1942) | 5' ATGGCGGTGGCGCCGACGAG                   |
| LmxM.13.1530 R3<br>(internal - position 1106) | 5' GTGACGAACAGCGAGATGGG                   |
| LmxM.29.1250 F                                | 5' CGGAAAGGGGCGAATCCATTGGT                |
| LmxM.29.1250 R                                | 5' CTGAAAAGGGCGCCAACCCC                   |
| LmxM.31.0510 F                                | 5' TCGTGGGCCAAATCATGGCGT                  |
| LmxM.31.0510 R                                | 5' TGCATTTTGGCTTCACGAGAAAGGCG             |
